## RESEARCH ARTICLE

# The roles of experienced and internalized weight stigma in healthcare experiences: Perspectives of adults engaged in weight management across six countries

Rebecca M. Puhl<sup>1,2</sup>\*, Leah M. Lessard<sup>2</sup>, Mary S. Himmelstein<sup>3</sup>‡, Gary D. Foster<sup>4,5</sup>‡

**1** Department of Human Development & Family Sciences, University of Connecticut, Storrs, Connecticut, United States of America, **2** Rudd Center for Food Policy and Obesity, University of Connecticut, Hartford, Connecticut, United States of America, **3** Department of Psychological Sciences, Kent State University, Kent, Ohio, United States of America, **4** WW, New York, New York, United States of America, **5** Center for Weight and Eating Disorders, Perelman School of Medicine, University of Pennsylvania, Philadelphia, Pennsylvania, United States of America

\* These authors contributed equally to this work.

‡ These authors also contributed equally to this work.

\* [Rebecca.puhl@uconn.edu](mailto:Rebecca.puhl@uconn.edu)

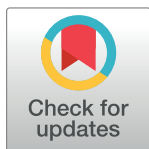

## OPEN ACCESS

**Citation:** Puhl RM, Lessard LM, Himmelstein MS, Foster GD (2021) The roles of experienced and internalized weight stigma in healthcare experiences: Perspectives of adults engaged in weight management across six countries. PLoS ONE 16(6): e0251566. <https://doi.org/10.1371/journal.pone.0251566>

**Editor:** Sarah E. Jackson, University College London, UNITED KINGDOM

**Received:** January 7, 2021

**Accepted:** April 28, 2021

**Published:** June 1, 2021

**Copyright:** © 2021 Puhl et al. This is an open access article distributed under the terms of the [Creative Commons Attribution License](https://creativecommons.org/licenses/by/4.0/), which permits unrestricted use, distribution, and reproduction in any medium, provided the original author and source are credited.

**Data Availability Statement:** Data cannot be shared publicly because this was not specified in the study protocol or consent forms, as advised by the Research Compliance Services of the University of Connecticut. Data access requests may be directed to Office of the Vice President for Research, Research Compliance Services/IRB, University of Connecticut (contact via [irb@uconn.edu](mailto:irb@uconn.edu)).

## Abstract

### Background/Objectives

Considerable evidence from U.S. studies suggests that weight stigma is consequential for patient-provider interactions and healthcare for people with high body weight. Despite international calls for efforts to reduce weight stigma in the medical community, cross-country research is lacking in this field. This study provides the first multinational investigation of associations between weight stigma and healthcare experiences across six Western countries.

### Methods

Participants were 13,996 adults residing in Australia, Canada, France, Germany, the UK, and the US who were actively enrolled in an internationally available behavioral weight management program. Participants completed identical online surveys in the dominant language for their country that assessed experienced weight stigma, internalized weight bias, and healthcare behaviors and experiences including perceived quality of care, avoidance or delay of seeking care, experiences with providers, and perceived weight stigma from doctors.

### Results

Among participants who reported a history of weight stigma (56–61%), two-thirds of participants in each country reported experiencing weight stigma from doctors. Across all six countries, after accounting for demographics, BMI, and experienced stigma, participants with higher internalized weight bias reported greater healthcare avoidance, increased perceived

**Funding:** RMP received grant funding for this study from WW International (formerly Weight Watchers). GDF is an employee and shareholder of WW (<https://www.weightwatchers.com/us/>), who provided input on study design and review and editing of the manuscript.

**Competing interests:** GDF is an employee and shareholder of WW. RMP has received research grant funding from WW. This does not alter our adherence to PLOS ONE policies on sharing data and materials.

judgment from doctors due to body weight, lower frequency of obtaining routine checkups, less frequent listening and respect from providers, and lower quality of healthcare. Additionally, experienced weight stigma (from any source) was indirectly associated with poorer healthcare experiences through weight bias internalization, consistently across the six countries.

## Conclusions

Weight stigma in healthcare is prevalent among adults actively engaged in weight management across different Western countries, and internalized weight bias has negative implications for healthcare even after controlling for BMI. The similar findings across all six countries underscore the negative consequences of weight stigma on healthcare behaviors and experiences, and emphasize the need for collective international efforts to address this problem.

## Introduction

High rates of obesity around the world [1] have garnered sustained attention and efforts from medical, public health, and scientific communities. Simultaneously, scholars across diverse social science disciplines have studied the pervasive societal stigma faced by individuals with higher body weight. Known as weight stigma, individuals with higher weight face numerous negative stereotypes, prejudice, and unfair treatment across multiple facets of everyday life including healthcare [2]. Despite increasing obesity rates in recent decades, research suggests that weight bias and stigma have worsened, rather than improved over time [3], even among obesity specialists [4]. Furthermore, evidence documenting the presence of weight stigma in many countries [5–7], and its harmful health consequences [8,9], has led to increasing recognition that weight stigma itself is a global health issue [10].

The health harms of weight stigma include numerous negative consequences for psychological wellbeing [8,9] and physical health [11–13], all of which accentuate the need for appropriate healthcare and treatment to both adequately support individuals who face weight stigma and diminish the adverse health effects incurred from this stigma. However, research spanning several decades has documented the presence of weight stigma in the healthcare setting [13–15], creating additional challenges and barriers to quality care for patients with higher weight. To date, most of this research examining associations between weight stigma and healthcare experiences of individuals with higher weight has come from the US. This evidence has identified a myriad of ways that weight stigma permeates the healthcare environment. In particular, studies have consistently documented negative weight-based stereotypes and attitudes reported by healthcare providers [16,17], including evidence that doctors express both implicit and explicit weight bias at levels similar to the general population [18]. These findings parallel reports from patients with higher body weight, who identify doctors as one of the most common interpersonal sources of weight stigma [19,20].

Additionally, weight stigma has concerning implications for patient-provider interactions and patients' healthcare utilization, as evidenced in US studies [10,15,21]. People who feel judged about their weight from a doctor report lower quality interactions with healthcare providers [22], less frequent clinician-patient interactions [22], lower trust in their primary care provider [23], and are more likely to switch doctors because of perceived differential treatment

because of their weight [24]. Furthermore, perceived weight stigma during medical visits is associated with worsened provider-patient relationships and adherence [25], lower perceived physician empathy [26], and intentions to avoid future medical appointments [27]. Recent research highlights the roles of both experienced weight stigma and internalized weight bias (e.g., applying negative weight stereotypes to oneself and engaging in self-devaluation based on one's weight) in healthcare avoidance, which explain the relationship between BMI and healthcare avoidance through body-related shame and guilt, and healthcare stress [28]. Given emerging evidence that higher weight bias internalization (WBI) is associated with weight stigma experienced from healthcare providers [29], these findings suggest the importance of studying both people's experiences of weight stigma in healthcare, and the ways in which internalizing weight stigma may affect their healthcare behaviors or experiences.

Outside of the U.S., studies in other countries have begun to document negative implications of weight stigma for healthcare [30]. For example, recent experimental studies from Australia show evidence of weight bias in health professionals' treatment decision-making for patients with higher weight [31], and that stigmatizing discussions about weight during doctor-patient interactions reduce patient motivation and compliance [32]. Australian studies have also documented associations between weight stigma and lower engagement with healthcare providers [33], and reported weight stigma across different medical disciplines [34,35]. Likewise, research has documented the presence of weight stigma among healthcare providers in countries like Canada [36–39], France [40], Germany [41–44], and the UK [45], where patient reports of weight stigma and self-reported attitudes of healthcare providers have been examined. However, links between weight stigma and healthcare experiences are less understood in these Western nations, and the different samples, measures, and methodologies (e.g., qualitative vs quantitative) used across these studies make it difficult to conduct comparisons in this emerging literature.

Furthermore, despite research documenting the presence of weight stigma in different parts of the world, cross-country comparisons are lacking in this field of study. This is especially evident with the absence of multinational research examining the implications of weight stigma for healthcare. A 2020 international consensus statement calling for the elimination of weight stigma (supported by more than 100 medical and scientific organizations worldwide) illustrates widespread recognition of weight stigma and its harmful health consequences, including the priority to address weight within the medical community [46]. We have recently begun to address this gap by conducting a multinational study with six countries to compare the nature, extent, and weight-related correlates of experienced weight stigma and internalized weight bias [47,48]. However, to date, no research has yet examined or compared weight stigma in the context of healthcare across different countries. Collective efforts to address weight stigma necessitate broad-scale investigation and cross-country comparisons to advance knowledge of how weight stigma affects healthcare experiences and to identify intervention targets that can help improve quality of healthcare for people with higher weight. As societal and cultural features of different countries may either temper or worsen implications of weight stigma for healthcare, it is important to begin to identify similarities and variations across countries that can inform broader stigma-reduction initiatives.

To begin to address this gap in the literature, the present study aimed to advance knowledge of the associations between weight stigma and healthcare across six Western countries. Using a multinational sample of adults enrolled in an internationally available weight management program, we systematically compared associations between experienced weight stigma, internalized weight bias, and healthcare indices including perceived quality of healthcare, avoidance or delay of medical care, relational experiences with healthcare providers, and weight

stigma from doctors. While comparisons across countries were exploratory, we predicted that weight stigma would be associated with adverse healthcare indices across countries.

## Materials and methods

### Participants and procedure

Using data from a larger study examining various aspects of weight stigma in an international sample [47,48], this study focuses on the healthcare experiences of adults from six countries: Australia, Canada, France, Germany, the United Kingdom (UK), and the United States (US). Participants were recruited from enrollees in an internationally available weight management program (WW, formerly Weight Watchers). WW is a validated behavioral weight management program that focuses on healthy habits related to food, activity, and mindset and has been proven effective in multiple randomized controlled trials [49–51]. Individuals at least 18 years of age who had been WW members for a minimum of three months were eligible to participate in the study, which was advertised as a survey to learn about people's experiences regarding body weight and health, including social experiences and challenges. All study protocols were approved by the institutional review board at the University of Connecticut (Protocol #X17-094).

Participants completed an identical, online questionnaire in the dominant language of their country. Language translation (and back translation) for the survey into French and German was completed by a professional translation services company [52]. Before data collection commenced, surveys were first pilot-tested in each country with small samples to assess survey comprehension. Data collection occurred during the time period of May 2020 to July 2020. Each week, email invitations to the study were sent to a subset of randomly selected WW members in each country (ranging from 4000–33,000 members, mean = 23,474). Participants provided consent in the online survey prior to completing questionnaires. Of those who entered the survey website ( $n = 23,415$ ), 8.0% were ineligible (i.e., declined to consent, were under 18 years old, did not indicate WW program involvement, WW member for less than 3 months, did not complete eligibility questions), and 2.8% who did not indicate residence in one of the six countries (e.g., Singapore) were excluded. After an additional 6,875 individuals were excluded who completed less than fifty percent of the questionnaire and/or did not report plausible key variables (i.e., height and weight, sex, level of education, weight stigma questions), the final analytic sample consisted of 13,996 adults (Australia = 1245, Canada = 2708, France = 2510, Germany = 2613, UK = 2305, US = 2615). Response rates within each country were as follows: 3.8%, Australia; 5.3%, Canada; 5.9%, France; 4.4%, Germany; 4.2% UK; 4.9% US.

Participants in the analytic sample ranged in age from 18 to 89 years ( $M = 47.3$ – $56.9$  years,  $SD = 10.7$ – $12.9$ ), predominantly identified as White (range = 91–97%), and female (range = 94–97%) across countries. Participants had an average BMI of 30.5 ( $SD = 6.7$ ), although the mean BMI of participants in France (29.3) was slightly lower than the other five countries. When considering weight status categories, most participants in each country had a  $BMI \geq 30$  (38–48% in each country: Australia = 594, Canada = 1240, France = 960, Germany = 1209, UK = 1051, US = 1212) or a BMI ranging from 25–29.9 (33–41% in each country: Australia = 457, Canada = 902, France = 1031, Germany = 942, UK = 794, US = 850); less prevalent across countries were participants who had a BMI ranging from 18.5–24.9 (16–21% in each country: Australia = 194, Canada = 556, France = 516, Germany = 461, UK = 457, US = 547), and  $BMI < 18.5$  (less than 1% in each country: Australia = 0, Canada = 10, France = 3, Germany = 1, UK = 3, US = 6).

## Measures

**Healthcare experiences.** Participants responded to nine items assessing multiple aspects of healthcare experiences and behaviors, both generally and in specific reference to the past 12 months. All items were derived from previously established and published measures. To assess *general healthcare avoidance*, participants were asked several questions from the Health Information National Trends Survey (HINTS) [53–55], including whether or not they avoid visiting their doctor even when they suspect they should (0 = *Not true*, 1 = *True*), and their agreement with the statement, “I avoid seeing my doctor because I feel uncomfortable when my body is being examined”; responses on a 4-point scale were reverse coded such that higher values reflect greater agreement (i.e., 1 = *Strongly disagree*– 4 = *Strongly agree*). Frequency of obtaining regular checkups was assessed with a single item [56] (i.e. “How often do you obtain regular checkups? [e.g., an annual physical exam and/or dental exam]”) rated on a 5-point scale (1 = *Never* to 5 = *Always*).

To assess more proximal healthcare experiences, participants indicated whether or not there was a time in the past 12 months when they needed medical care (0 = *No*, 1 = *Yes*), as well as whether they delayed or did not get the care they thought they needed (0 = *No*, 1 = *Yes*) [57,58].

Additionally, three items assessed quality of *relational experiences with doctors*: 1) “During the past 12 months, how often did doctors or other health providers listen carefully to you?” [59], 2) “During the past 12 months, how often did doctors or other health providers show respect for what you had to say?” [59], 3) “In the last 12 months, did you ever feel that a doctor judged you because of your weight?” [60]. A final item assessed perceived *quality of healthcare* received (“Overall, how would you rate the quality of health care you received in the past 12 months?”) [53]. Whereas the relational experience items were assessed on a 4-point scale, a 5-point scale was used to measure quality of healthcare received. The items were reverse coded, such that higher values reflect more careful listening and respect by doctors, more doctor judgment (i.e., 1 = *Never* to 4 = *Always*) and perceptions of greater quality of received healthcare (i.e., 1 = *Poor* to 5 = *Excellent*) in the last year.

**Experienced weight stigma.** Three yes/no questions assessed previous history of experienced stigma, asking participants “Have you ever been [teased / treated unfairly / discriminated against] because of your weight?” [61]. A dichotomous indicator was created to distinguish individuals who responded “yes” to at least one of the items from those who did not endorse any items (i.e., experienced any weight stigma versus none). In addition, those who reported having experienced weight stigma were asked to indicate the frequency of experiencing weight stigma from doctors on a scale from 0 (*Never*) to 3 (*Multiple times*).

**Internalized weight bias.** Participants responded to the 10-item Modified Weight Bias Internalization Scale (WBIS-M) [62–64], assessing self-directed blame and negative self-judgment due to body weight as well as internalization of negative weight-based stereotypes (e.g., “My weight is a major way that I judge my value as a person”). Responses on a 7-point scale (1 = *Strongly disagree* to 7 = *Strongly agree*) were averaged, with higher values indicating greater internalization. Internal consistencies were similarly high across the six countries (0.91–0.93).

**Covariates.** Several participant characteristic variables were included as covariates. Participants reported their age, sex, and educational attainment (coded as college degree or equivalent versus no college degree). As it was not permissible by law to collect participant race/ethnicity in France and Germany, this information was not included as a covariate. Self-reported height and weight were used to calculate participants’ BMI; to be inclusive of diverse body sizes, height, weight, and BMI variables were scrutinized case-by-case and implausible values (e.g., “6 inches”; <15 in each country) were removed in the exclusion of key variables

process described above. In addition, each participant reported on the duration of their WW membership ( $M_{\text{Australia}} = 2.6$  years,  $M_{\text{Canada}} = 3.6$ ,  $M_{\text{France}} = 1.3$ ,  $M_{\text{Germany}} = 2.2$ ,  $M_{\text{UK}} = 3.0$ ,  $M_{\text{US}} = 3.8$ ) and WW membership type, which included Digital (access to the WW app and online tools), Digital + Workshop (access to WW coach-led workshops- in-person and/or virtual- as well as app/online tools), or Personal Coaching + Digital (individual support from a WW coach in addition to app/online tools). Sample WW membership type breakdown in each country is as follows; 32–61% Digital: Australia = 585, Canada = 951, France = 1088, Germany = 1605, UK = 821, US = 838; 38–67% Digital + Workshop: Australia = 605, Canada = 1739, France = 1421, Germany = 986, UK = 1448, US = 1760; 0–4% Personal Coaching + Digital: Australia = 55, Canada = 18, France = 1, Germany = 22, UK = 36, US = 17. Personal Coaching + Digital membership type was removed as a covariate in France regression and mediation models due to low prevalence.

**Analytic plan.** Sample characteristics related to demographics, anthropometrics, and weight stigma experienced from doctors are reported first. Descriptive healthcare experience information and unadjusted associations with stigma (experienced and internalized) are subsequently provided. Between-country differences in healthcare experiences overall, and as a function of experienced weight stigma, were assessed using chi-square tests and one-way analyses of variance (ANOVA), respectively. Bivariate correlations were used to measure the strength of associations between WBIS and each of the (continuous) healthcare indicators within each country.

Next, we present regression models examining links between stigma (experienced and internalized) and healthcare experiences, over and above demographics, BMI, and WW variables. Although internalized weight bias is higher among individuals who have, versus have not, experienced weight stigma [ $t(13264.69) = -42.86$ ,  $p < .001$ ; a distinction retained across all countries with all  $p$ 's  $< .001$ ], the constructs are conceptually distinct. Whereas linear regression was used to predict continuous outcomes (e.g., frequency of obtaining regular checkups), logit models were constructed to predict general avoidance of doctor, and delaying and/or not getting needed healthcare in the last 12 months. Finally, we turn to mediation models that examine the indirect effect of experienced stigma on the healthcare indicators through internalized weight bias; a montecarlo integration algorithm was used for the two binary outcome variables (i.e., general avoidance of doctor, avoidance of needed healthcare). Regression and mediation analyses accounted for age, sex (male, female), educational attainment (college degree or equivalent, no college degree or equivalent), BMI, WW membership duration and membership type (Digital, Digital + Workshop, Personal Coaching + Digital). Participants who identified as “other” sex were excluded from the regression and mediation analyses given low prevalence across countries ( $n = 0–6$ ). A log transformation was used to correct for non-normality in BMI and WW membership duration; age, BMI, and WW membership duration were centered within each country. Descriptive analyses were performed in SPSS (version 27), while regression analyses and mediation models were conducted in Mplus. Missing data was handled with listwise deletion. To reduce the likelihood of Type I error (given the large sample size), statistical significance was set at  $p \leq .001$  [65,66]. Ninety-nine percent confidence intervals are reported for the indirect effect estimates.

## Results

**Table 1** displays frequency of experiencing weight stigma from doctors. Weight stigma from doctors was reported by two-thirds (66.6%) of participants across countries who indicated experiencing any weight stigma (i.e., those not selecting “never” to any type of stigma,

**Table 1. Frequency of experiencing weight stigma from doctors.**

|                                                               | Total sample | Australia                 | Canada                    | France                    | Germany                   | United Kingdom            | United States             |
|---------------------------------------------------------------|--------------|---------------------------|---------------------------|---------------------------|---------------------------|---------------------------|---------------------------|
|                                                               | % (N)        | % (N)                     | % (N)                     | % (N)                     | % (N)                     | % (N)                     | % (N)                     |
| <i>Frequency of experiencing weight stigma from a doctor:</i> |              |                           |                           |                           |                           |                           |                           |
| Multiple times                                                | 19.8 (1570)  | 20.1 (137) <sup>a,c</sup> | 20.7 (336) <sup>a,c</sup> | 11.6 (157) <sup>b</sup>   | 21.3 (303) <sup>a,c</sup> | 19.6 (256) <sup>a</sup>   | 24.8 (381) <sup>c</sup>   |
| More than once                                                | 26.4 (2087)  | 23.3 (159) <sup>a,b</sup> | 24.8 (403) <sup>a,b</sup> | 28.1 (379) <sup>a,b</sup> | 29.7 (422) <sup>a</sup>   | 24.1 (314) <sup>b</sup>   | 26.7 (410) <sup>a,b</sup> |
| Once                                                          | 20.4 (1611)  | 19.1 (130) <sup>a,b</sup> | 19.3 (313) <sup>a,b</sup> | 23.7 (320) <sup>a</sup>   | 22.4 (318) <sup>a,b</sup> | 19.2 (250) <sup>a,b</sup> | 18.2 (280) <sup>b</sup>   |
| Never                                                         | 33.4 (2647)  | 37.4 (255) <sup>a</sup>   | 35.2 (572) <sup>a,c</sup> | 36.5 (492) <sup>a</sup>   | 26.5 (377) <sup>b</sup>   | 37.2 (485) <sup>a</sup>   | 30.3 (466) <sup>b,c</sup> |

Note. Item only administered to participants who reported at least one experience of weight stigma. Values within the same row not sharing the same subscript letter are significantly different from each other at  $p \leq .001$ .

<https://doi.org/10.1371/journal.pone.0251566.t001>

independent of source). Prevalence of weight stigma from doctors was more common in Germany (73.5%) compared to all other countries, with the exception of the US.

### Descriptive healthcare information and associations with stigma

On average, 29% of participants across countries avoided visiting their doctor even when they suspected they should. Between-country differences emerged in healthcare avoidance,  $\chi^2(5) = 182.34$ ,  $p < .001$ . Follow-up comparisons indicated that prevalence of healthcare avoidance was significantly higher in the UK (39%) versus other countries. Healthcare avoidance was more common in Germany (32%) and France (30%) compared to Canada (24%) and the US (24%).

The majority (70%;  $n = 9592$ ) of participants indicated needing medical care in the past 12 months. Between-country differences were revealed [ $\chi^2(5) = 122.17$ ,  $p < .001$ ], with follow-up comparisons indicating that need of medical care in the last year was significantly higher in Australia (79%;  $n = 968$ ) compared to all other countries, with the exception of Germany (74%;  $n = 1894$ ). In addition, medical need in the past year was more common in Germany compared to France (69%;  $n = 1683$ ), Canada (67%;  $n = 1774$ ), as well as the UK (64%;  $n = 1451$ ) which was in turn significantly lower than France and the US (71%;  $n = 1822$ ). Chi-square tests revealed that reports of needing medical care in the last year were similar between males and females within each country [Australia:  $\chi^2(1) = 1.32$ ,  $p = .251$ , Canada:  $\chi^2(1) = 9.07$ ,  $p = .003$ , France:  $\chi^2(1) = 1.97$ ,  $p = .160$ , Germany:  $\chi^2(1) = 0.01$ ,  $p = .921$ , UK:  $\chi^2(1) = 0.29$ ,  $p = .590$ , US:  $\chi^2(1) = 1.73$ ,  $p = .189$ ]. Within-country independent samples t-tests indicated no BMI differences between individuals who reported needing medical care in the past 12 months in the US [ $t(1530.86) = -2.26$ ,  $p = .024$ ], Germany [ $t(2552) = -1.74$ ,  $p = .082$ ], and France [ $t(1581.09) = -2.97$ ,  $p = .003$ ]; however, in Australia [ $t(434.55) = -4.88$ ,  $p < .001$ ], Canada [ $t(1835.39) = -4.26$ ,  $p < .001$ ], and the UK [ $t(1777.83) = -4.48$ ,  $p < .001$ ], higher BMI was documented among those who needed medical care in the past year.

Among those who reported needing medical care in the past year, 22% overall indicated delaying or not getting the care they thought they needed. Significant between-country differences emerged [ $\chi^2(5) = 90.23$ ,  $p < .001$ ], such that prevalence of avoidance of healthcare was significantly lower in the US (16%) compared to all other countries. In addition, avoidance was less common in Canada (20%) relative to France (25%), and the UK (28%) which in turn was significantly greater than Germany (21%).

Table 2 details descriptive information and across country comparisons for the continuous healthcare indicators, including both general healthcare experiences, as well as those pertaining to the past 12 months (examined only among individuals who indicated needing medical care in the last year). Within-country t-tests revealed that across each of the six nations,

**Table 2. Descriptive information about healthcare experiences, stratified by country and experienced weight stigma.**

| Healthcare Experiences                                                                                    | Total sample | Australia                  | Canada                    | France                    | Germany                   | United Kingdom           | United States             |        |        |
|-----------------------------------------------------------------------------------------------------------|--------------|----------------------------|---------------------------|---------------------------|---------------------------|--------------------------|---------------------------|--------|--------|
|                                                                                                           | M (SD)       | M (SD)                     | M (SD)                    | M (SD)                    | M (SD)                    | M (SD)                   | M (SD)                    | F      | p      |
| <b>General experiences</b>                                                                                |              |                            |                           |                           |                           |                          |                           |        |        |
| <i>How often do you obtain regular checkups?</i> <sup>1</sup>                                             | 3.96 (1.19)  | 3.68 <sup>a</sup> (1.22)   | 4.15 <sup>b</sup> (1.07)  | 3.68 <sup>a</sup> (1.21)  | 4.11 <sup>b</sup> (1.11)  | 3.52 <sup>c</sup> (1.38) | 4.38 <sup>d</sup> (0.96)  | 199.59 | < .001 |
| Any weight stigma                                                                                         | 3.86 (1.22)  | 3.47 (1.26)                | 4.07 (1.10)               | 3.59 (1.23)               | 4.02 (1.14)               | 3.43 (1.38)              | 4.27 (1.03)               |        |        |
| No weight stigma                                                                                          | 4.09 (1.14)  | 3.93 (1.13)                | 4.29 (1.01)               | 3.79 (1.17)               | 4.23 (1.06)               | 3.66 (1.37)              | 4.53 (0.82)               |        |        |
| <i>I avoid seeing my doctor because I feel uncomfortable when my body is being examined.</i> <sup>2</sup> | 1.80 (0.99)  | 1.89 <sup>a</sup> (1.04)   | 1.77 <sup>b</sup> (1.00)  | 1.72 <sup>b</sup> (0.90)  | 1.78 <sup>b</sup> (0.96)  | 1.97 <sup>a</sup> (1.06) | 1.74 <sup>b</sup> (0.99)  | 21.19  | < .001 |
| Any weight stigma                                                                                         | 1.99 (1.05)  | 2.11 (1.08)                | 1.96 (1.06)               | 1.86 (0.94)               | 1.97 (1.03)               | 2.21 (1.11)              | 1.93 (1.05)               |        |        |
| No weight stigma                                                                                          | 1.53 (0.83)  | 1.61 (0.90)                | 1.48 (0.81)               | 1.54 (0.80)               | 1.52 (0.81)               | 1.64 (0.89)              | 1.45 (0.81)               |        |        |
| <b>Experiences during past 12 months</b> <sup>3</sup>                                                     |              |                            |                           |                           |                           |                          |                           |        |        |
| <i>How often did doctors or other health providers listen carefully to you?</i> <sup>4</sup>              | 3.27 (0.77)  | 3.32 <sup>adf</sup> (0.74) | 3.36 <sup>ab</sup> (0.74) | 3.17 <sup>ce</sup> (0.75) | 3.25 <sup>cd</sup> (0.78) | 3.14 <sup>e</sup> (0.84) | 3.36 <sup>bf</sup> (0.72) | 24.11  | < .001 |
| Any weight stigma                                                                                         | 3.18 (0.79)  | 3.23 (0.77)                | 3.26 (0.77)               | 3.10 (0.76)               | 3.19 (0.78)               | 3.01 (0.86)              | 3.26 (0.75)               |        |        |
| No weight stigma                                                                                          | 3.41 (0.71)  | 3.48 (0.67)                | 3.54 (0.64)               | 3.27 (0.72)               | 3.34 (0.77)               | 3.36 (0.75)              | 3.52 (0.61)               |        |        |
| <i>How often did doctors or other health providers show respect for what you had to say?</i> <sup>4</sup> | 3.31 (0.76)  | 3.40 <sup>acf</sup> (0.71) | 3.45 <sup>ab</sup> (0.70) | 3.35 <sup>c</sup> (0.71)  | 3.02 <sup>d</sup> (0.80)  | 3.26 <sup>e</sup> (0.82) | 3.45 <sup>bf</sup> (0.68) | 86.40  | < .001 |
| Any weight stigma                                                                                         | 3.22 (0.78)  | 3.28 (0.74)                | 3.36 (0.74)               | 3.27 (0.74)               | 2.94 (0.79)               | 3.13 (0.85)              | 3.35 (0.72)               |        |        |
| No weight stigma                                                                                          | 3.45 (0.70)  | 3.58 (0.63)                | 3.62 (0.60)               | 3.45 (0.66)               | 3.13 (0.79)               | 3.46 (0.72)              | 3.62 (0.56)               |        |        |
| <i>Did you ever feel that a doctor judged you because of your weight?</i> <sup>4</sup>                    | 1.43 (0.72)  | 1.45 <sup>ac</sup> (0.75)  | 1.40 <sup>ab</sup> (0.72) | 1.46 <sup>ac</sup> (0.69) | 1.33 <sup>b</sup> (0.61)  | 1.53 <sup>c</sup> (0.84) | 1.46 <sup>ac</sup> (0.74) | 14.61  | < .001 |
| Any weight stigma                                                                                         | 1.59 (0.81)  | 1.62 (0.84)                | 1.54 (0.81)               | 1.59 (0.75)               | 1.47 (0.69)               | 1.74 (0.95)              | 1.63 (0.83)               |        |        |
| No weight stigma                                                                                          | 1.18 (0.46)  | 1.18 (0.48)                | 1.13 (0.41)               | 1.28 (0.54)               | 1.14 (0.42)               | 1.20 (0.46)              | 1.18 (0.44)               |        |        |
| <i>Perceived quality of received healthcare</i> <sup>5</sup>                                              | 3.98 (0.97)  | 4.16 <sup>a</sup> (0.92)   | 4.20 <sup>a</sup> (0.93)  | 3.89 <sup>b</sup> (0.82)  | 3.59 <sup>c</sup> (1.01)  | 3.92 <sup>b</sup> (1.05) | 4.19 <sup>a</sup> (0.89)  | 113.66 | < .001 |
| Any weight stigma                                                                                         | 3.89 (0.99)  | 4.04 (0.96)                | 4.09 (0.95)               | 3.84 (0.83)               | 3.51 (1.02)               | 3.79 (1.09)              | 4.07 (0.93)               |        |        |
| No weight stigma                                                                                          | 4.11 (0.92)  | 4.35 (0.83)                | 4.40 (0.84)               | 3.97 (0.82)               | 3.69 (0.98)               | 4.13 (0.95)              | 4.38 (0.80)               |        |        |

Note. Values within the same row not sharing the same letter are significantly different from each other at  $p \leq .001$ .

<sup>1</sup>Response options ranged from 1 (Never) to 5 (Always).

<sup>2</sup>Response options ranged from 1 (Strongly disagree) to 4 (Strongly agree).

<sup>3</sup>Descriptives calculated only among individuals who indicated needing medical care in the last year.

<sup>4</sup>Response options ranged from 1 (Never) to 4 (Always).

<sup>5</sup>Response options ranged from 1 (Poor) to 5 (Excellent).

<https://doi.org/10.1371/journal.pone.0251566.t002>

individuals who had experienced weight stigma reported obtaining less frequent regular checkups (all  $p$ 's < 0.001) and greater healthcare avoidance due to feeling uncomfortable with body examination (all  $p$ 's < 0.001) compared to those who had not experienced weight stigma. In addition, across all countries, individuals who had experienced weight stigma reported that



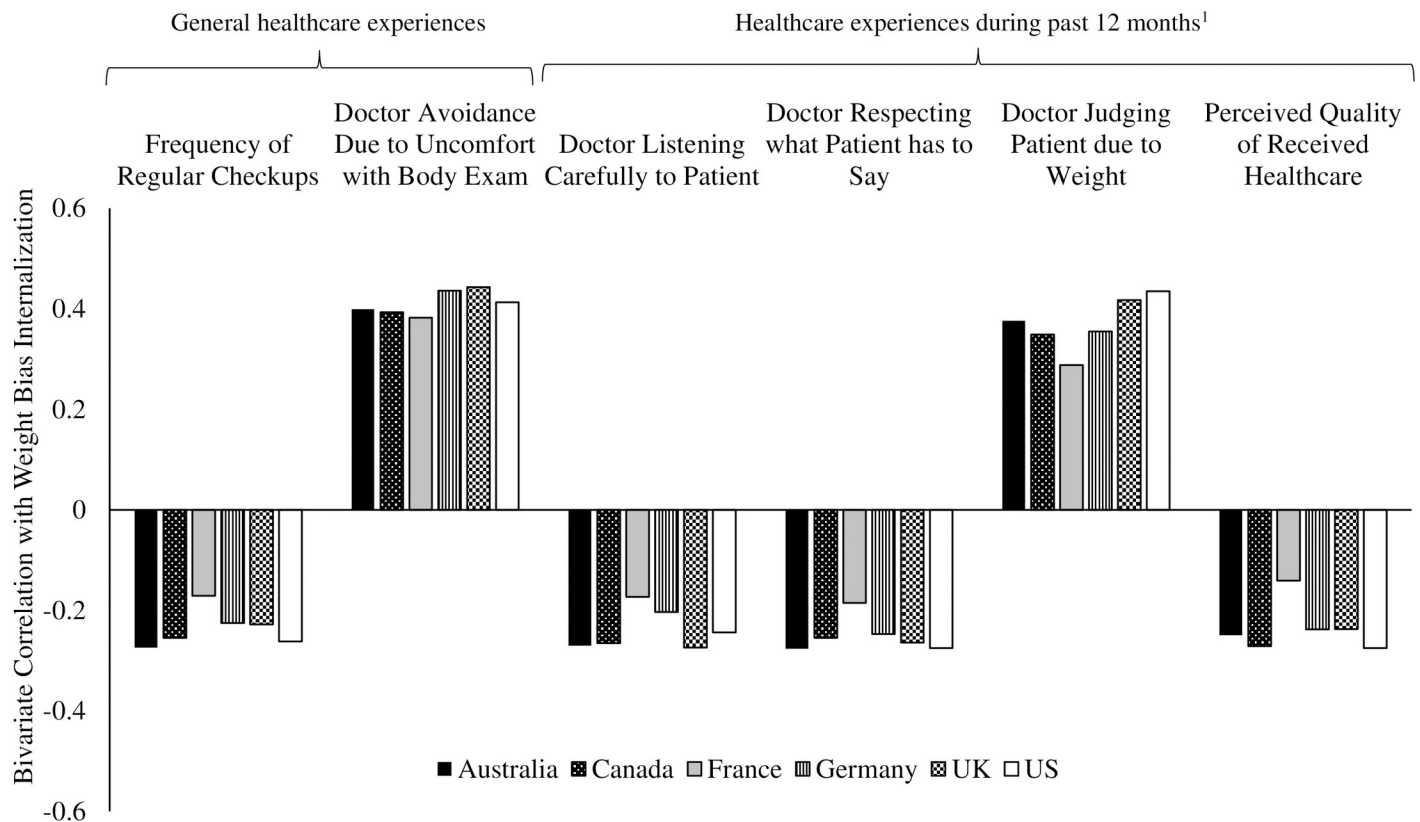

Note. <sup>1</sup>Correlations computed only among individuals who indicated needing medical care in the last year.

**Fig 1. Bivariate correlations between weight bias internalization and (continuous) healthcare experience indicators.**

<https://doi.org/10.1371/journal.pone.0251566.g001>

during the past 12 months their doctors less frequently listened carefully to them (all  $p$ 's < 0.001), less frequently respected what they had to say (all  $p$ 's < 0.001), and judged them more frequently because of their weight (all  $p$ 's < 0.001) relative to those who had not experienced weight stigma. Furthermore, in each country, perceived quality of healthcare received in the last year was significantly lower among individuals who had, versus had not, experienced weight stigma (all  $p$ 's ≤ 0.001). Taken together, despite across-country variation in mean levels of the healthcare indicators, experienced weight stigma functioned with considerable consistency in each country—relating more negatively to overall and recent healthcare experiences.

To assess the strength of associations between weight bias internalization (WBI) and each of the (continuous) healthcare indicators, within-country unadjusted bivariate correlations were computed. Weight bias internalization was most strongly associated with general healthcare avoidance due to feeling uncomfortable with a bodily exam ( $r$ 's = .38 to .44), followed by judgement by doctor due to weight in the last 12 months ( $r$ 's = .29 to .44) (Fig 1). Small negative associations emerged between WBI and frequency of regular checkups ( $r$ 's = -.17 to -.27), as well as doctor listening carefully to patient ( $r$ 's = -.17 to -.27), doctor respecting what patient has to say ( $r$ 's = -.19 to -.28), and perceived quality of care ( $r$ 's = -.14 to -.28) in the past year.

### Regression models predicting healthcare experiences

Table 3 presents associations between weight stigma (experienced and internalized) and the healthcare indicators in each country above and beyond the demographic, anthropometric and weight management covariates. After accounting for the covariates and experienced weight stigma, WBI was a significant predictor of each healthcare indicator. Specifically, individuals reporting higher levels of WBI in each country indicated greater avoidance of seeing

**Table 3. Associations between weight stigma (experienced and internalized) and healthcare experience indicators.**

|                                                                                | Australia    |        | Canada       |        | France       |        | Germany      |        | United Kingdom |        | United States |        |
|--------------------------------------------------------------------------------|--------------|--------|--------------|--------|--------------|--------|--------------|--------|----------------|--------|---------------|--------|
|                                                                                | $\beta$      | $p$    | $\beta$      | $p$    | $\beta$      | $p$    | $\beta$      | $p$    | $\beta$        | $p$    | $\beta$       | $p$    |
| <i>Frequency of obtaining regular checkups</i>                                 |              |        |              |        |              |        |              |        |                |        |               |        |
| Experienced Weight Stigma                                                      | -0.17        | .006   | -0.03        | .413   | -0.03        | .567   | -0.01        | .746   | 0.05           | .293   | -0.08         | .056   |
| Internalized Weight Bias                                                       | <b>-0.19</b> | < .001 | <b>-0.21</b> | < .001 | <b>-0.14</b> | < .001 | <b>-0.20</b> | < .001 | <b>-0.18</b>   | < .001 | <b>-0.18</b>  | < .001 |
| BMI                                                                            | 0.03         | .436   | 0.01         | .543   | 0.02         | .415   | -0.03        | .124   | -0.03          | .211   | -0.02         | .330   |
| <i>Doctor avoidance due to feeling uncomfortable with body exam</i>            |              |        |              |        |              |        |              |        |                |        |               |        |
| Experienced Weight Stigma                                                      | <b>0.19</b>  | .001   | <b>0.25</b>  | < .001 | 0.12         | .003   | <b>0.16</b>  | < .001 | <b>0.22</b>    | < .001 | <b>0.21</b>   | < .001 |
| Internalized Weight Bias                                                       | <b>0.34</b>  | < .001 | <b>0.33</b>  | < .001 | <b>0.34</b>  | < .001 | <b>0.38</b>  | < .001 | <b>0.37</b>    | < .001 | <b>0.34</b>   | < .001 |
| BMI                                                                            | 0.04         | .222   | 0.05         | .018   | 0.06         | .007   | 0.06         | .005   | <b>0.08</b>    | < .001 | 0.04          | .089   |
| <i>Doctor listening carefully to patient in last 12 months<sup>1</sup></i>     |              |        |              |        |              |        |              |        |                |        |               |        |
| Experienced Weight Stigma                                                      | -0.16        | .024   | <b>-0.24</b> | < .001 | -0.10        | .059   | -0.06        | .203   | <b>-0.24</b>   | < .001 | <b>-0.23</b>  | < .001 |
| Internalized Weight Bias                                                       | <b>-0.24</b> | < .001 | <b>-0.23</b> | < .001 | <b>-0.13</b> | < .001 | <b>-0.20</b> | < .001 | <b>-0.22</b>   | < .001 | <b>-0.19</b>  | < .001 |
| BMI                                                                            | 0.01         | .887   | 0.02         | .549   | -0.04        | .182   | 0.02         | .459   | 0.00           | .954   | 0.03          | .250   |
| <i>Doctor respecting what patient has to say in last 12 months<sup>1</sup></i> |              |        |              |        |              |        |              |        |                |        |               |        |
| Experienced Weight Stigma                                                      | <b>-0.26</b> | < .001 | <b>-0.25</b> | < .001 | -0.12        | .017   | -0.09        | .075   | <b>-0.22</b>   | < .001 | <b>-0.22</b>  | < .001 |
| Internalized Weight Bias                                                       | <b>-0.24</b> | < .001 | <b>-0.22</b> | < .001 | <b>-0.14</b> | < .001 | <b>-0.24</b> | < .001 | <b>-0.19</b>   | < .001 | <b>-0.23</b>  | < .001 |
| BMI                                                                            | 0.03         | .428   | 0.01         | .680   | -0.04        | .103   | 0.02         | .401   | -0.05          | .107   | 0.02          | .468   |
| <i>Doctor judging patient due to weight in last 12 months<sup>1</sup></i>      |              |        |              |        |              |        |              |        |                |        |               |        |
| Experienced Weight Stigma                                                      | <b>0.24</b>  | < .001 | <b>0.29</b>  | < .001 | <b>0.16</b>  | .001   | <b>0.26</b>  | < .001 | <b>0.28</b>    | < .001 | <b>0.25</b>   | < .001 |
| Internalized Weight Bias                                                       | <b>0.19</b>  | < .001 | <b>0.18</b>  | < .001 | <b>0.16</b>  | < .001 | <b>0.22</b>  | < .001 | <b>0.23</b>    | < .001 | <b>0.29</b>   | < .001 |
| BMI                                                                            | <b>0.28</b>  | < .001 | <b>0.26</b>  | < .001 | <b>0.28</b>  | < .001 | <b>0.20</b>  | < .001 | <b>0.29</b>    | < .001 | <b>0.21</b>   | < .001 |
| <i>Perceived quality of received healthcare in last 12 months<sup>1</sup></i>  |              |        |              |        |              |        |              |        |                |        |               |        |
| Experienced Weight Stigma                                                      | -0.17        | .010   | <b>-0.19</b> | < .001 | -0.04        | .419   | -0.04        | .397   | -0.16          | .004   | <b>-0.16</b>  | .001   |
| Internalized Weight Bias                                                       | <b>-0.19</b> | < .001 | <b>-0.24</b> | < .001 | <b>-0.10</b> | .001   | <b>-0.25</b> | < .001 | <b>-0.20</b>   | < .001 | <b>-0.22</b>  | < .001 |
| BMI                                                                            | 0.00         | .919   | 0.02         | .522   | -0.08        | .002   | 0.03         | .214   | -0.01          | .785   | 0.00          | .884   |
|                                                                                | OR           | $p$    | OR           | $p$    | OR           | $p$    | OR           | $p$    | OR             | $p$    | OR            | $p$    |
| <i>General avoidance of doctor</i>                                             |              |        |              |        |              |        |              |        |                |        |               |        |
| Experienced Weight Stigma                                                      | <b>1.98</b>  | < .001 | <b>1.52</b>  | < .001 | 1.10         | .356   | 1.06         | .577   | 1.22           | .055   | 1.22          | .086   |
| Internalized Weight Bias                                                       | <b>1.43</b>  | < .001 | <b>1.47</b>  | < .001 | <b>1.33</b>  | < .001 | <b>1.38</b>  | < .001 | <b>1.40</b>    | < .001 | <b>1.49</b>   | < .001 |
| BMI                                                                            | 0.75         | .479   | 1.45         | .140   | 1.20         | .527   | 1.45         | .145   | 1.37           | .169   | 1.69          | .046   |
| <i>Delayed or did not get needed healthcare in last 12 months<sup>1</sup></i>  |              |        |              |        |              |        |              |        |                |        |               |        |
| Experienced Weight Stigma                                                      | 1.61         | .013   | 1.49         | .008   | 1.09         | .507   | 1.21         | .139   | 1.34           | .042   | 1.49          | .017   |
| Internalized Weight Bias                                                       | <b>1.44</b>  | < .001 | <b>1.38</b>  | < .001 | <b>1.28</b>  | < .001 | <b>1.31</b>  | < .001 | <b>1.58</b>    | < .001 | <b>1.47</b>   | < .001 |
| BMI                                                                            | 1.30         | .561   | 1.17         | .622   | 2.67         | .005   | 1.15         | .667   | 0.74           | .357   | 1.46          | .278   |

Note. Regression models run separately for each country and separately for each healthcare outcome variable. In addition to BMI, covariates include age, sex, educational attainment, WW membership duration and membership type. Boldface indicates statistical significance.

<sup>1</sup>Estimated models include only individuals who indicated needing medical care in the last year. (A similar pattern of results emerged when examining the associations among the full sample).

<https://doi.org/10.1371/journal.pone.0251566.t003>

one's doctor due to being uncomfortable with the body exam, increased perceived judgment from doctors due to body weight in the last 12 months, and greater likelihood of healthcare avoidance in general and when healthcare was needed. In addition, reported frequency of regularly obtaining checkups, perceived careful listening as well as respect from doctors, and quality of received healthcare in the last 12 months were all negatively associated with WBI in each country.

After accounting for WBI and the set of covariates, direct associations between experienced weight stigma and two of the healthcare indicators (i.e., frequency of obtaining regular checkups in general, and delaying or not getting needed healthcare in the last 12 months) were non-significant, consistently across all six countries. However, individuals who reported experienced weight stigma indicated more frequent judgment from doctors due to their weight in the last 12 months across all countries. Differential associations emerged across countries when considering perceived quality of received healthcare, respect and careful listening from doctors in the last 12 months, as well as healthcare avoidance due to being uncomfortable with the body examination and general avoidance of seeing one's doctor (see Table 3). For example, individuals who indicated having experienced at least one instance of weight stigma from any source (versus none) reported a greater avoidance due to feeling uncomfortable with one's body examination in all countries, except in France. In addition, while experienced weight stigma was associated with a greater odds of general healthcare avoidance in Australia ( $OR = 1.98, p < .001$ ) and Canada ( $OR = 1.52, p < .001$ ), the direct association was non-significant in all other countries.

### Mediation models examining indirect effects of experienced stigma

To test how experienced stigma might indirectly contribute to healthcare experiences, we examined the link between experienced weight stigma on each of the eight healthcare indicators through internalized weight bias within the six countries. Above and beyond the demographic, anthropometric and weight management covariates, the indirect path from experienced weight stigma to healthcare experiences through internalized weight bias was significant for all eight outcomes, in all six countries (S1–S8 Figs). Individuals who had, versus had not, experienced weight stigma reported higher levels of internalized weight bias, which in turn was related to reduced frequency of obtaining regular checkups [indirect effects: Australia = -0.09, Canada = -0.08, France = -0.06, Germany = -0.09, UK = -0.09, US = -0.08], greater doctor avoidance due to feeling uncomfortable when body is being examined [indirect effects: Australia = 0.16, Canada = 0.13, France = 0.14, Germany = 0.18, UK = 0.18, US = 0.15], and greater likelihood of general doctor avoidance [indirect effects: Australia = 0.13, Canada = 0.12, France = 0.09, Germany = 0.11, UK = 0.13, US = 0.13].

A similar pattern of indirect effects emerged when considering each of the indicators of healthcare behaviors and experiences in the past 12 months (examined only among individuals who indicated needing medical care in the last year). Specifically, experienced weight stigma was associated with higher levels of internalization, which in turn was related to lower perceived quality of healthcare received in the last 12 months [indirect effects: Australia = -0.09, Canada = -0.09, France = -0.05, Germany = -0.11, UK = -0.09, US = -0.10], greater likelihood of avoidance of needed healthcare in the past year [indirect effects: Australia = 0.13, Canada = 0.10, France = 0.08, Germany = 0.09, UK = 0.16, US = 0.13], and poorer patient-provider relationships in the last 12 months as indicated by perceptions of less careful listening [indirect effects: Australia = -0.12, Canada = -0.09, France = -0.06, Germany = -0.09, UK = -0.10, US = -0.09] and less respect [indirect effects: Australia = -0.12, Canada = -0.09, France = -0.07,

Germany = -0.11, UK = -0.09, US = -0.10] by doctors, and more doctor judgment [indirect effects: Australia = 0.09, Canada = 0.07, France = 0.08, Germany = 0.10, UK = 0.11, US = 0.13].

Taken together, WBI was consistently linked to the healthcare indices across the six countries. Despite variation in the direct associations between experienced weight stigma and healthcare experiences, the indirect effects through internalized weight bias were consistent across each of the healthcare indicators and across each of the six countries. Further, the near entirety of non-significant associations between BMI and the healthcare indicators underscores the critical role that social psychological processes play in healthcare behaviors.

## Discussion

There is much that is unknown about the relationship between internalized weight stigma and healthcare, and there is little published work on this relationship in countries outside of the US. Our study makes a significant contribution as the first multinational comparison of links between weight stigma and healthcare across different countries, using identical measures and comparable samples. Our findings illustrate considerable consistency in associations between weight stigma and adverse healthcare indices across each of the six countries investigated. Compared to individuals with no history of weight stigma, unadjusted/raw associations revealed that participants across countries who had experienced weight stigma reported obtaining less frequent regular medical checkups, greater healthcare avoidance due to feeling uncomfortable with their body being examined, more frequent judgment from doctors due to their weight, worse quality of their recent healthcare experiences, and reported that their doctors less frequently listened carefully to them and less frequently respected what they had to say. This consistent pattern of results highlights a concerning role of weight stigma in healthcare experiences in multiple countries, regardless of between-country variation in overall levels of reported medical need and healthcare delay or avoidance.

Underscoring healthcare as a critical context for negative weight-related judgement, devaluation and unfair treatment, our findings shed light on the universality of weight stigma within the healthcare setting. Across all countries in the present investigation, perceived weight stigmatization in the healthcare environment was a common phenomenon. For example, among participants who had a history of experiencing weight stigma, on average two-thirds across countries reported being stigmatized about their weight from a doctor. This finding is somewhat similar to prevalence estimates among US samples of adults engaged in weight management who have reported experiencing weight stigma from healthcare professionals [19,20]. Given that the majority (70%) of participants across the six countries in our study indicated needing medical care in the past 12 months, the commonality of weight stigma from doctors reported by participants represents a significant public health concern.

Importantly, our findings highlight the significant role of weight bias internalization (WBI) in healthcare experiences for people engaged in weight management across different countries, extending initial evidence within a US sample [28]. Indeed, WBI retained unique predictive value for each of the healthcare indicators after accounting for covariate effects (e.g., demographic characteristics, BMI), while direct effects between experienced weight stigma and two of the healthcare indicators (i.e., frequency of obtaining regular checkups, delaying or not getting needed healthcare in the last 12 months) were no longer significant. Specifically, in each of the six countries, participants with higher WBI reported greater avoidance of seeing one's doctor due to being uncomfortable with the body exam, increased perceived judgment from their doctor due to body weight, increased likelihood of healthcare avoidance (both in general and when medical attention was needed), lower frequency of regularly obtaining checkups, less frequent listening and respect from doctors, and worse quality of healthcare in the last 12

months. Moreover, our mediation analyses findings imply that internalized weight bias accounts in part for compromised healthcare experiences of individuals who have been teased, discriminated against, and/or treated unfairly because of their weight. In other words, experiencing weight stigma contributes to greater internalization of weight bias, which in turn relates to poorer healthcare experiences. Notably, the indirect effects of experienced weight stigma to healthcare behaviors and experiences through internalized weight bias were consistent across all healthcare indices, and across all six countries.

Together, these findings parallel emerging US studies implicating both experienced weight stigma [22,23,25,28] and WBI [22,28] as factors associated with poorer patient-provider relationships and reduced quality of care, both in community samples [23,28] and among samples of people with medical diagnoses like type 2 diabetes [22] and hypothyroidism [25]. Given limited research attention to these relationships in treatment-seeking and general population samples, our findings underscore the need for increased research studies to assess the effects of WBI on healthcare utilization, quality, and patient outcomes, which have not yet been adequately examined in the literature. In particular, prospective and experimental studies will provide important insights into whether adverse healthcare experiences contribute to WBI or vice versa.

Collectively, our study offers several key insights. First, our results indicate that WBI is a consistent correlate of healthcare indices for people engaged in weight management across different countries, and may play a more proximal role in contributing to adverse healthcare experiences than an individual's history of experienced weight stigma. Recent studies in North America, Europe, and Australia have found that WBI uniquely contributes to psychological distress, disordered eating behaviors, and adverse physical health indices, over and above other demographic and anthropomorphic covariates [67]. Our findings add to this evidence suggesting that the negative implications of WBI extend to healthcare experiences among people engaged in weight management. Given that WBI has received limited research attention in the context of healthcare, this should be a priority for future research. Second, most associations between participants' BMI and healthcare indicators were non-significant across the six countries in our study, emphasizing the importance of stigma processes in healthcare behaviors, rather than body weight per se. WBI can adversely affect health and wellbeing for people of diverse body sizes [67]; thus, rather than limiting research attention to links between obesity and healthcare, our findings underscore the need to focus on stigma-related risk factors, mechanisms, and barriers that impact healthcare, independent of BMI. Obtaining regular care, minimizing delays in healthcare, and promoting effective provider-patient communication are vital to early detection and effective treatment of a number of chronic diseases [68–70], of which individuals with high weight may be at elevated risk. Given that the challenges and barriers caused by weight stigma within healthcare may exacerbate poor health and treatment outcomes, eliminating weight stigma is an essential step to ensure more effective, stigma-free care and treatment.

### Limitations and strengths

Several limitations are present in this study that should be taken into account in interpreting the findings. The cross-sectional data do not allow for causal conclusions to be made with respect to the relationship between healthcare experiences and weight stigma; there is a need for longitudinal examination of these constructs. Our data relied on self-reported recall of stigma and healthcare experiences; as such, more comprehensive assessment, including data from healthcare records, would be informative. Relatedly, self-report bias may be present given that participants who reported weight stigma (experienced and/or internalized) may be

more likely to perceive threat and appraisal social cues more negatively, including treatment from healthcare professionals. Further, not all of the measures used in this study have been validated in every language. For example, the psychometric properties of the Weight Bias Internalization Scale have been evaluated in German populations [71], but not yet in France or many other non-English speaking countries, indicating the need for broader scale validation across countries. The racial/ethnic and gender diversity of our sample was limited primarily to white women, and those of middle age; examination of links between weight stigma and healthcare experiences in more diverse multinational samples is warranted, particularly given evidence that internalization of weight stigma may be different for women and men, and among individuals of different racial/ethnic backgrounds [72]. Our study was also limited to Western countries, and future cross-country research should include other parts of the world where experiences of weight stigma may be different. The low response rate prevents generalization to all WW members and/or those seeking treatment, and our study findings should be interpreted accordingly. Similarly, our study samples may not be representative of individuals with higher weight in general; given that individuals with obesity are more likely to report experiencing discrimination in healthcare than individuals at lower weights [73], additional studies are needed with both treatment-seeking and community samples of people with high weight, including individuals who are not engaged in weight management. Finally, attention checks were not present, and data were collected during the spring/summer of 2020 in the midst of the COVID-19 pandemic, which may have affected the nature of participants' responses and/or the survey response rate.

Despite these limitations, several aspects of our study strengthen its contribution to the literature. First, in addition to the large sample size, our data provide the first multinational comparison of weight stigma and healthcare, contributing novel insights to the scant cross-cultural research in the weight stigma literature. Second, the use of identical measures and similar samples across countries allows for meaningful comparisons of key variables that have not previously been examined in different countries. Third, the inclusion of simultaneous modeling of both experienced weight stigma and internalized weight bias allow for novel insights about the pathways by which stigma contributes to healthcare experiences (i.e., experienced weight stigma → internalized weight bias → adverse healthcare experiences).

## Conclusions

Our study has clear implications for collective, cross-country initiatives to address weight stigma in the context of healthcare. In addition to prioritizing research to better understand the impact of weight stigma on healthcare experiences, utilization, and patient outcomes, our findings indicate the importance of establishing a healthcare culture free of weight stigma. Increasingly, national organizations in countries like the US [74], Canada [75], the UK [76] as well as Europe [77] have called for initiatives to address weight stigma, including improvements in communication and engagement between health professionals and people with obesity [70]. Most recently, a 2020 international joint consensus called for efforts to reduce weight stigma from multiple stakeholders, including actions from the medical community [46]. Key recommendations from this consensus statement include calling upon professional bodies to facilitate and develop methods to certify knowledge of weight stigma, its harmful effects, and stigma-free practice skills among healthcare providers. Implementing education and training of healthcare professionals and practitioners will be critical to these efforts, and will require increased awareness of personal biases, understanding of the ways in which weight stigma negatively affects health and patient care, and education of strategies to reduce weight stigma in healthcare encounters and clinical practice. As suggested by our study findings, these efforts

are needed in multiple countries; thus, collective and collaborative initiatives to address weight stigma should be prioritized.

## Supporting information

**S1 Fig. Standardized effect estimates of experienced weight stigma on frequency of obtaining regular checkups through internalized weight bias, separately for each country.** Covariates included age, sex, educational attainment, BMI, WW membership duration, WW membership type. \* $p \leq .001$ .

(PDF)

**S2 Fig. Standardized effect estimates of experienced weight stigma on doctor avoidance (due to feeling uncomfortable with body exam) through internalized weight bias, separately for each country.** Covariates included age, sex, educational attainment, BMI, WW membership duration, WW membership type. \* $p \leq .001$ .

(PDF)

**S3 Fig. Standardized effect estimates of experienced weight stigma on doctor listening carefully to patient through internalized weight bias, separately for each country.** Covariates included age, sex, educational attainment, BMI, WW membership duration, WW membership type. \* $p \leq .001$ .

(PDF)

**S4 Fig. Standardized effect estimates of experienced weight stigma on doctor showing respect for what patient has to say through internalized weight bias, separately for each country.** Covariates included age, sex, educational attainment, BMI, WW membership duration, WW membership type. \* $p \leq .001$ .

(PDF)

**S5 Fig. Standardized effect estimates of experienced weight stigma on perceptions of doctor judging patient due to weight through internalized weight bias, separately for each country.** Covariates included age, sex, educational attainment, BMI, WW membership duration, WW membership type. \* $p \leq .001$ .

(PDF)

**S6 Fig. Standardized effect estimates of experienced weight stigma on perceived quality of healthcare received in last 12 months through internalized weight bias, separately for each country.** Covariates included age, sex, educational attainment, BMI, WW membership duration, WW membership type. \* $p \leq .001$ .

(PDF)

**S7 Fig. Standardized effect estimates of experienced weight stigma on general avoidance of doctor through internalized weight bias, separately for each country.** Covariates included age, sex, educational attainment, BMI, WW membership duration, WW membership type. \* $p \leq .001$ .

(PDF)

**S8 Fig. Standardized effect estimates of experienced weight stigma on avoidance of needed healthcare in last 12 months through internalized weight bias, separately for each country.** Covariates included age, sex, educational attainment, BMI, WW membership duration, WW membership type. \* $p \leq .001$ .

(PDF)

## Acknowledgments

The authors would like to thank WW members who participated in this study and shared their experiences of weight stigma.

## Author Contributions

**Conceptualization:** Rebecca M. Puhl, Gary D. Foster.

**Data curation:** Leah M. Lessard.

**Formal analysis:** Leah M. Lessard.

**Funding acquisition:** Rebecca M. Puhl.

**Investigation:** Rebecca M. Puhl.

**Methodology:** Rebecca M. Puhl, Leah M. Lessard, Mary S. Himmelstein, Gary D. Foster.

**Project administration:** Leah M. Lessard.

**Resources:** Gary D. Foster.

**Supervision:** Gary D. Foster.

**Writing – original draft:** Rebecca M. Puhl, Leah M. Lessard.

**Writing – review & editing:** Rebecca M. Puhl, Leah M. Lessard, Mary S. Himmelstein, Gary D. Foster.

## References

1. GBD Collaborators. Health Effects of Overweight and Obesity in 195 Countries over 25 Years. *New Eng J Med.* 2017; 377:13–27. <https://doi.org/10.1056/NEJMoa1614362> PMID: 28604169
2. Pearl RL. Weight bias and stigma: Public health implications and structural solutions. *Soc Issues Policy Rev.* 2018; 12(1):146–82.
3. Charlesworth TES, Banaji MR. Patterns of implicit and explicit attitudes: Long term change and stability from 2007 to 2016. *Psychol Sci.* 2019; 30:174–192. <https://doi.org/10.1177/0956797618813087> PMID: 30605364
4. Tomiyama JA, Finch LE, Incollingo Belsky AC, Buss J, Finley C, Schwartz MB, et al. Weight bias in 2001 versus 2013: Contradictory attitudes among obesity researchers and health professionals. *Obesity.* 2015; 23:46–53. <https://doi.org/10.1002/oby.20910> PMID: 25294247
5. Brewis AA, Wutich A, Falletta-Cowden A, Rodriguez-Soto I. Body norms and fat stigma in a global perspective. *Cur Anthropology.* 2011; 52:269–276.
6. Puhl RM, Latner JL, O'Brien K, Luedicke JL, Danielstottir S, Forhan M. A multi-national examination of weight bias: Predictors of anti-fat attitudes across four countries. *Int J Obes.* 2015; 39:1166–1173.
7. Crandall CS, D'Anello S, Sakalli N, Lazarus E, Nejtardt GW, Feather NT. An attribution-value model of prejudice: anti-fat attitudes in six nations. *Pers Soc Psychol Bul.* 2001; 27:30–37.
8. Wu Y, Berry DC. Impact of weight stigma on physiological and psychological health outcomes for overweight and obese adults: A systematic review. *J Adv Nurs.* 2017; 74:1030–1042. <https://doi.org/10.1111/jan.13511> PMID: 29171076
9. Alimoradi Z, Golboni F, Griffiths MD, Brostrom A, Lin C-Y, Pakpour AH. Weight-related stigma and psychological distress: A systematic review and meta-analysis. *Clin Nutr.* 2020; 39:2001–2013. <https://doi.org/10.1016/j.clnu.2019.10.016> PMID: 31732288
10. Brewis A SturtzSreetharan C, Wutich A. Obesity stigma is a globalizing health challenge. *Globalization and Health.* 2018; 14:20. <https://doi.org/10.1186/s12992-018-0337-x> PMID: 29439728
11. Sutin AR, Stephan Y, Terracciano A. Weight discrimination and risk of mortality. *Psychol Sci.* 2015; 26(11):1803–1811. <https://doi.org/10.1177/0956797615601103> PMID: 26420442
12. Udo T, Grilo CM. Perceived weight discrimination, child maltreatment, and weight gain in U.S. adults with overweight and obesity. *Obesity.* 2016; 24(6):1366–1372. <https://doi.org/10.1002/oby.21474> PMID: 27112217



13. Tomiyama A, Carr D, Granberg E, et al. How and why weight stigma drives the obesity 'epidemic' and harms health. *BMC Medicine*. 2018; 16: 123. <https://doi.org/10.1186/s12916-018-1116-5> PMID: 30107800
14. Puhl RM, Brownell KD. Bias, discrimination, and obesity. *Obesity*. 2001; 9(12):788–805.
15. Phelan SM, Burgess DJ, Yeazel MW, Hellerstedt WL, Griggin JM, van Ryn M. Impact of weight bias and stigma on quality of care and outcomes for patients with obesity. *Obes Rev*. 2015; 16:319–326. <https://doi.org/10.1111/obr.12266> PMID: 25752756
16. Foster GB, Wadden TA, Makris AP, Davidson D, Sanderson RS, et al. Primary care physicians' attitudes about obesity and its treatment. *Obes Res*. 2003; 11:1168–1177. <https://doi.org/10.1038/oby.2003.161> PMID: 14569041
17. Puhl RM, Heuer CA. The stigma of obesity: A review and update. *Obesity*. 2009; 17(5):941–964. <https://doi.org/10.1038/oby.2008.636> PMID: 19165161
18. Sabin JA, Marini M, Nosek BA. Implicit and explicit anti-fat bias among a large sample of medical doctors by BMI, race/ethnicity and gender. *PLoS One*. 2012; 7:e48448. <https://doi.org/10.1371/journal.pone.0048448> PMID: 23144885
19. Puhl RM, Brownell KD. Confronting and coping with weight stigma: an investigation of overweight and obese adults. *Obesity*. 2006; 14:1802–1815. <https://doi.org/10.1038/oby.2006.208> PMID: 17062811
20. Puhl RM, Himmelstein MS, Pearl RL, Wojtanowski AC, Foster GD. Weight stigma among sexual minority adults: Findings from a matched sample of adults engaged in weight management. *Obesity*. 2019; 27(11):1906–1915. <https://doi.org/10.1002/oby.22633> PMID: 31689008
21. Mold F, Forbes A. Patients' and professionals' experiences and perspectives of obesity in health-care settings: a synthesis of current research. *Health Expectations*. 2011; 16:119–142. <https://doi.org/10.1111/j.1369-7625.2011.00699.x> PMID: 21645186
22. Puhl RM, Himmelstein MS, Hateley-Browne JL, Speight J. Weight stigma and diabetes stigma in U.S. adults with type 2 diabetes associations with diabetes self-care Behaviors and perceptions of health care. *Diab Res Clin Pract*. 2020; 168:108387. <https://doi.org/10.1016/j.diabres.2020.108387> PMID: 32858100
23. Gudzone KA, Bennett WL, Cooper LA, Bleich SN. Patients who feel judged about their weight have lower trust in their primary care providers. *Pat Educ Counsel*. 2014; 97:128–131. <https://doi.org/10.1016/j.pec.2014.06.019> PMID: 25049164
24. Gudzone KA, Bennett WL, Cooper LA, Clark JM, Bleich SN. Prior doctor shopping resulting from differential treatment correlates with differences in current patient-provider relationships. *Obesity*. 2014; 22:1952–1955. <https://doi.org/10.1002/oby.20808> PMID: 24942593
25. Snyder M, Haskard-Zolnerek K, Howard K, Hu Y. Weight stigma is associated with provider-patient relationship factors and adherence for individuals with hypothyroidism. *J Health Psychol*. 2020; <https://doi.org/10.1177/1359105320963548> PMID: 33081509
26. Ferrante JM, Seaman K, Bator A, Ohman-Strickland P, Gundersen D, Clemow L, et al. Impact of perceived weight bias among underserved women on doctor-patient relationships. *Obes Sci Pract*. 2016; 2:128–135. <https://doi.org/10.1002/osp4.40> PMID: 27293804
27. Puhl RM, Peterson JL, Luedicke J. Motivating or stigmatizing? Public perceptions of language about weight used by health providers. *Int J Obes*. 2012; 37:612–619.
28. Mensinger JL, Tylka TL, Calamari ME. Mechanisms underlying weight status and healthcare avoidance in women: A study of weight stigma, body-related shame and guilt, and healthcare stress. *Body Image*. 2018; 25:139–147. <https://doi.org/10.1016/j.bodyim.2018.03.001> PMID: 29574257
29. Pearl RL, Wadden TA, Tronieri JS, Chao AM, Alamuddin N, Bakizada ZM, et al. Sociocultural and familial factors associated with weight bias internalization. *Obes Facts*. 2018; 11:157–164. <https://doi.org/10.1159/000488534> PMID: 29656285
30. O'Keeffe M, Flint SW, Watts K, Rubino F. Knowledge gaps and weight stigma shape attitudes toward obesity. *The Lancet: Diab & Endocrinol*. 2020; 8(5):363–365. [https://doi.org/10.1016/S2213-8587\(20\)30073-5](https://doi.org/10.1016/S2213-8587(20)30073-5) PMID: 32142624
31. Rathbone JA, Cruwys T, Jetten J, Barlow FK. When stigma is the norm: How weight and social norms influence the healthcare we receive. *J Appl Soc Psychol*. 2020; <https://doi.org/10.1111/jasp.12676> PMID: 33071308
32. Hayward LE, Neang S, Ma S, Vartanian LR. Discussing weight with patients with overweight: Supportive (not stigmatizing) conversations increase compliance intentions and health motivation. *Stigma and Health*. 2020; 5(1):53–68.
33. Spooner C, Jayasinghe UW, Faruqi N, Stocks N, Harris MF. Predictors of weight stigma experienced by middle-older aged, general-practice patients with obesity in disadvantaged areas of Australia: A cross-

- sectional study. *BMC Pub Health*. 2018; 16:640. <https://doi.org/10.1186/s12889-018-5556-9> PMID: 29783962
34. Setchell J, Watson B, Jones L, Gard M, Briffa K. Physiotherapists demonstrate weight stigma: a cross-sectional survey of Australian physiotherapists. *J Physiother*. 2014; 60:157–162. <https://doi.org/10.1016/j.jphys.2014.06.020> PMID: 25084637
  35. Mulherin K, Miller YD, Barlow FK, Diedrichs PC, Thompson R. Weight stigma in maternity care: women's experiences and care providers' attitudes. *BMC Pregnancy Childbirth*. 2013; 13:19. <https://doi.org/10.1186/1471-2393-13-19> PMID: 23339533
  36. Alberga AS, Nutter S, MacInnis C, Ellard JH, Russell-Mayhew S. Examining weight bias among practicing Canadian family physicians. *Obes Facts*. 2019; 12:632–638. <https://doi.org/10.1159/000503751> PMID: 31707395
  37. Bombak AE, McPhail D, Ward P. Reproducing stigma: Interpreting “overweight” and “obese” women's experiences of weight-based discrimination in reproductive healthcare. *Soc Sci Med*. 2016; 166:94–101. <https://doi.org/10.1016/j.socscimed.2016.08.015> PMID: 27544463
  38. LaMarre A, Rice C, Cook K, Friedman M. Fat reproductive justice: Navigating the boundaries of reproductive health care. *J Soc Issues*. 2020; 76(2):338–362.
  39. Forhan M, Risdon C, Solomon P. Contributors to patient engagement in primary health care: Perceptions of patients with obesity. *Prim Health Care Res Dev*. 2013; 14:367–372. <https://doi.org/10.1017/S1463423612000643> PMID: 23237022
  40. Bocquier A, Verger P, Basdevant A, Andreotti G, Baretge J, Villani P, et al. Overweight and obesity: knowledge, attitudes, and practices of general practitioners in France. *Obes Res*. 2005; 13:787–795. <https://doi.org/10.1038/oby.2005.89> PMID: 15897489
  41. Tanneberger A, Ciupitu-Plath C. Nurses' weight bias in caring for obese patients: Do weight controllability beliefs influence the provision of care to obese patients? *Clin Nurs Res*. 2018; 27(4):414–432. <https://doi.org/10.1177/1054773816687443> PMID: 28052689
  42. Sikorski C, Luppá M, Glaesmer H, Brahler E, König HH, Riedel-Heller SG. Attitudes of health care professionals towards female obese patients. *Obes Facts*. 2013; 6:512–522. <https://doi.org/10.1159/000356692> PMID: 24296724
  43. Jung FUC, Luck-Sikorski C, König H-H, Riedel-Heller SG. Stigma and knowledge as determinants of recommendation and referral behavior of general practitioners and internists. *Obes Surg*. 2016; 26:2392–2401.
  44. Schwenke M, Luppá M, Pabst A, Welzel FD, Lobner M, Luck-Sikorski C, et al. Attitudes and treatment practice of general practitioners towards patients with obesity in primary care. *BMC Fam Pract*. 2020; 21:169. <https://doi.org/10.1186/s12875-020-01239-1> PMID: 32807094
  45. Swift JA, Hanlon S, El-Redy L, Puhl RM, Glazebrook C. Weight bias among UK trainee dietitians, doctors, nurses and nutritionists. *J Hum Nutr Diet*. 2013; 26:395–402. <https://doi.org/10.1111/jhn.12019> PMID: 23171227
  46. Rubino F, Puhl RM, Cummings DE, Eckel RH, Ryan DH, Mechanick JI, et al. Joint international consensus statement for ending stigma of obesity. *Nat Med* 2020; 26:485–497. <https://doi.org/10.1038/s41591-020-0803-x> PMID: 32127716
  47. Puhl RM, Lessard LM, Pearl RL, Himmelstein MS, Foster GD. International comparisons of weight stigma: Addressing a void in the field. *Int J Obesity*. In press.
  48. Pearl RL, Puhl RM, Lessard L, Himmelstein MS, Foster GD. Prevalence and Correlates of Weight Bias Internalization in Weight Management: A Multinational Study. *SSM-Population Health* 2021; 13:100755. <https://doi.org/10.1016/j.ssmph.2021.100755> PMID: 33718581
  49. Gudzone KA, Doshi RS, Mehta AK, et al. Efficacy of commercial weight-loss programs: an updated systematic review. *Ann Intern Med*. 2015; 162: 501–512. <https://doi.org/10.7326/M14-2238> PMID: 25844997
  50. Ahern A, Wheeler GM, Aveyard P, Boyland EJ, Halford JCG, Mander AP. Extended and standard duration weight-loss programme referrals for adults in primary care (WRAP): A randomised controlled trial. *The Lancet*. 2017; 389: P2214–2225. [https://doi.org/10.1016/S0140-6736\(17\)30647-5](https://doi.org/10.1016/S0140-6736(17)30647-5) PMID: 28478041
  51. Wojtanowski AC, Foster GD. Scaling science-based approaches beyond the clinic. In Morton JM, Brethauer SA, DeMaria EJ, Kahan S, Hutter MM, editors. *Quality in obesity treatment*. Switzerland: Springer Nature; 2019. p117–128.
  52. Language Scientific. Available at <https://www.languagescientific.com/>. Accessed September 6, 2020.
  53. Health Information National Trends Survey (HINTS). Available at <https://hints.cancer.gov>. Accessed October 5th, 2020.

54. Cantor D, Coa K, Crytal-Mansour S, Davis T, Dipko S, Sigman R. Health Information National Trends Survey (HINTS) 2007 Final Report. 2009. National Cancer Institute; Washington, DC.
55. Chan YM, Laster C. Evaluation of healthcare avoidance using the Health Information National Trends Survey. *Am J Health Studies*. 2015; 30(1):34–42.
56. Kulbok PA, Carter KF, Baldwin JH, Gilmartin MJ, Kirkwood B. The Multidimensional Health Behavior Inventory. *J Nurs Measurement*. 1999; 7(2): <https://doi.org/10.1891/1061-3749.7.2.177> PMID: 10710860
57. Burgess DJ, Ding Y, Hargreaves M, Van Ryn M, Phelan S. The association between perceived discrimination and underutilization of needed medical and mental health care in a multi-ethnic community sample. *J Health Care Poor Underserved*. 2008; 19(3):894–911. <https://doi.org/10.1353/hpu.0.0063> PMID: 18677077
58. Agency for Healthcare Research and Quality (AHRQ). Survey questionnaires: house-hold component. Medical Expenditure Panel Survey. 2001. Rockville, MD: Department of Health and Human Services, AHRQ. Available at [http://www.meps.ahrq.gov/mepsweb/survey\\_comp/survey.jsp#Questionnaires](http://www.meps.ahrq.gov/mepsweb/survey_comp/survey.jsp#Questionnaires). Accessed September 8, 2020.
59. Hargraves JL, Hays RD, Cleary PD. Psychometric properties of the Consumer Assessment of Health Plans Study (CAHPS) 2.0 Adult Core Survey. *Health Services Res*. 2003; 38(6):1509–1528. <https://doi.org/10.1111/j.1475-6773.2003.00190.x> PMID: 14727785
60. Gudzone KA, Bennet WL, Cooper LA, & Bleich SN. Perceived judgment about weight can negatively influence weight loss: A cross-sectional study of overweight and obese patients. *Prev Med*. 2014; 62:103–107. <https://doi.org/10.1016/j.ypmed.2014.02.001> PMID: 24521530
61. Puhl R, Quinn D, Weisz B, Suh Y. The role of stigma in weight loss maintenance among U.S. adults. *Ann Behav Med*. 2017; 5:754–63. <https://doi.org/10.1007/s12160-017-9898-9> PMID: 28251579
62. Durso LE, Latner JD. Understanding self-directed stigma: Development of the Weight Bias Internalization Scale. *Obesity*. 2008; 16:S80–6. <https://doi.org/10.1038/oby.2008.448> PMID: 18978768
63. Lee MS, Dedrick RF. Weight Bias Internalization Scale: Psychometric properties using alternative weight status classification approaches. *Body Image*. 2016; 17:25–29. <https://doi.org/10.1016/j.bodyim.2016.01.008> PMID: 26907913
64. Pearl RL, Puhl RM. Measuring internalized weight attitudes across body weight categories: Validation of the modified weight bias internalization scale. *Body Image*. 2014; 11(1):89–92. <https://doi.org/10.1016/j.bodyim.2013.09.005> PMID: 24100004
65. Benjamin DJ, Berger JO, Johannesson M, Nosek BA, Wagenmakers E-J, Berk R, et al. Redefine statistical significance. *Nat Hum Behav*. 2018; 2:6–10. <https://doi.org/10.1038/s41562-017-0189-z> PMID: 30980045
66. Newman ML, Groom CJ, Handelman LD, Pennebaker JW. Gender differences in language use: an analysis of 14,000 text samples. *Discourse Process*. 2008; 45:211–236.
67. Pearl RL, Puhl RM. Weight bias internalization and health: A systematic review. *Obes Rev*. 2018; 19(8):1141–1163. <https://doi.org/10.1111/obr.12701> PMID: 29788533
68. Herman WH, Ye W, Griffin SJ, Simmons RK, Davies MJ, Khunti K, et al. Early detection and treatment of type 2 diabetes reduce cardiovascular morbidity and mortality: A simulation of the results of the Anglo-Danish-Dutch Study of intensive treatment in people with screen-detected diabetes in primary care (ADDITION-Europe). *Diab Care*. 2015; 38:1449–1455.
69. Lee H, Cho J, Shin DW, Lee S-P, Hwang S-S, Oh J, et al. Association of cardiovascular health screening with mortality, clinical outcomes, and health care cost: A nationwide cohort study. *Prev Med*. 2015; 70:19–25. <https://doi.org/10.1016/j.ypmed.2014.11.007> PMID: 25445334
70. Polonsky WH, Capehorn M, Belton A, Down S, Alzaid A, Gamerman V, et al. Physician-patient communication at diagnosis of type 2 diabetes and its links to patient outcomes: New results from the global IntroDia study. *Diab Res Clin Pract*. 2017; 127:265–274. <https://doi.org/10.1016/j.diabres.2017.03.016> PMID: 28407552
71. Hilbert A, Baldofski S, Zenger M, Löwe B, Kersting A, Braehler E. Weight Bias Internalization Scale: Psychometric Properties and Population Norms. *PLoS ONE* 2014; 9(1): e86303. <https://doi.org/10.1371/journal.pone.0086303> PMID: 24489713
72. Himmelstein MS, Puhl RM, Quinn DM. Intersectionality: An understudied framework for addressing weight stigma. *Am J Prev Med* 2017; 53:421–431. <https://doi.org/10.1016/j.amepre.2017.04.003> PMID: 28579331
73. Gupta N, Bombak A, Foroughi I, Riediger N. Discrimination in the health care system among higher-weight adults: Evidence from a Canadian national cross-sectional survey. *Health Promotion & Chronic Disease Prevention in Canada: Research, Policy & Practice*. 2020; 40:329–335. <https://doi.org/10.24095/hpcdp.40.11/12.01> PMID: 33296298

74. Pont SJ, Puhl R, Cook SR, Slusser W. Stigma experienced by children and adolescents with obesity. *Pediatrics*. 2017;140 (6) e20173034; <https://doi.org/10.1542/peds.2017-3034> PMID: 29158228
75. Kirk SFL, Ramos Salas X, Alberga AS, Russell-Mayhew Canadian adult obesity clinical practice guidelines: Reducing weight bias, stigma and discrimination in obesity management, practice and policy. 2020. Available from: <https://obesitycanada.ca/guidelines/weightbias>. Accessed October 10, 2020.
76. Albury C, Strain WD, Le Brocq S, Logue J, Lloyd C, Tahrani A. The importance of language in the engagement between health-care professionals and people living with obesity: A joint consensus statement. *The Lancet: Diab Endocrin*. 2020; 8(5):447–455. [https://doi.org/10.1016/S2213-8587\(20\)30102-9](https://doi.org/10.1016/S2213-8587(20)30102-9) PMID: 32333880
77. World Health Organization Regional Office for Europe. Weight bias and obesity stigma: considerations for the WHO European Region. Available at [https://www.euro.who.int/\\_\\_data/assets/pdf\\_file/0017/351026/WeightBias.pdf](https://www.euro.who.int/__data/assets/pdf_file/0017/351026/WeightBias.pdf) Accessed November 20, 2020.
