# Supplementary material for: The roles of experienced and internalized weight stigma in healthcare experiences: Perspectives of adults engaged in weight management across six countries
Source: PubMed Central journal article supplement (PMC8168902; doi:10.1371/journal.pone.0251566), 2021-06-01
Supplement: pone.0251566.s001.pdf [file pone.0251566.s001.pdf]

Figure 2. Standardized estimates of experienced weight stigma on frequency of obtaining regular checkups through internalized weight bias, separately for each country. Covariates included age, sex, educational attainment, BMI, WW membership duration, WW membership type. \* $p \leq .001$ .

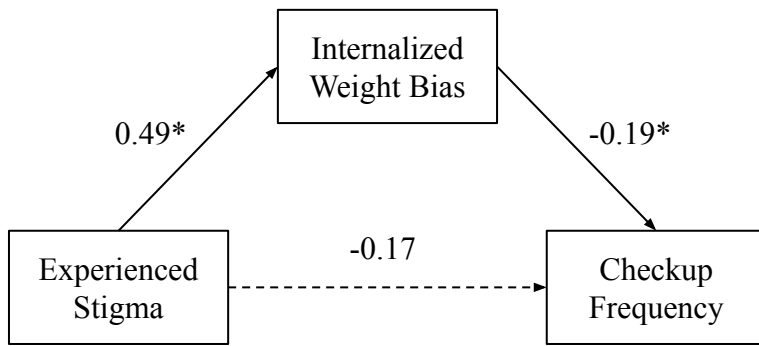

Indirect Effect = -0.09, 99% CI: -0.14 to -0.04

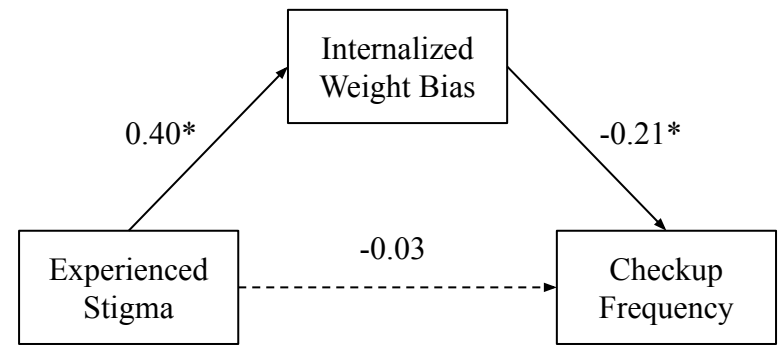

Indirect Effect = -0.08, 99% CI: -0.11 to -0.05

Figure 2a. Indirect effect of experienced stigma, **Australia**

Figure 2b. Indirect effect of experienced stigma, **Canada**

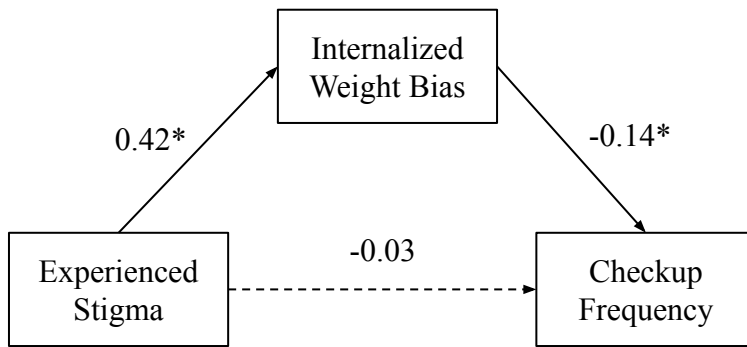

Indirect Effect = -0.06, 99% CI: -0.09 to -0.03

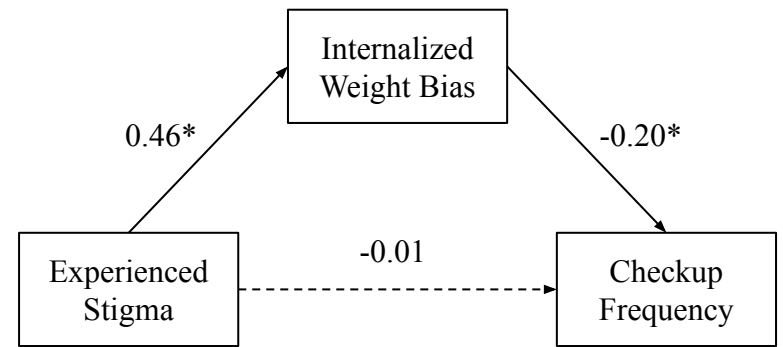

Indirect Effect = -0.09, 99% CI: -0.12 to -0.06

Figure 2c. Indirect effect of experienced stigma, **France**

Figure 2d. Indirect effect of experienced stigma, **Germany**

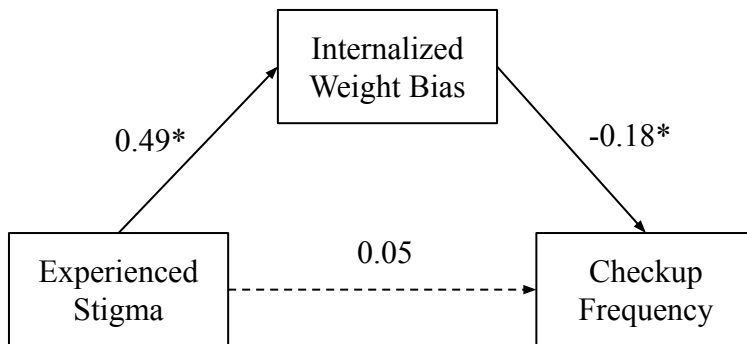

Indirect Effect = -0.09, 99% CI: -0.12 to -0.05

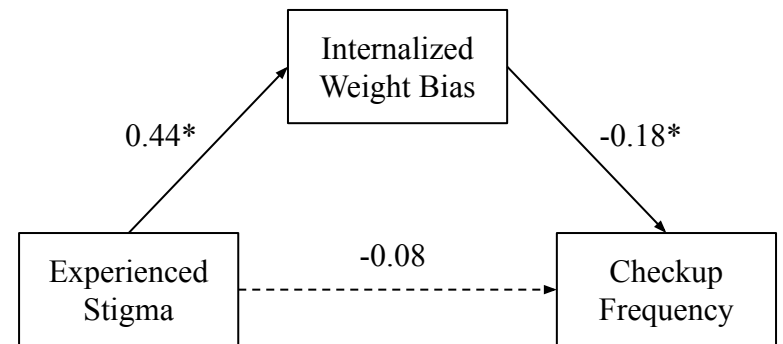

Indirect Effect = -0.08, 99% CI: -0.11 to -0.05

Figure 2e. Indirect effect of experienced stigma, **United Kingdom**

Figure 2f. Indirect effect of experienced stigma, **United States**
